# Supplementary material for: How to Decide the Iodine Content in Salt for a Country—China as an Example
Source: MDPI journal article supplement (doi:10.3390/nu14214606), 2022-11-01
Supplement: s1 [file s1]

Table S1. Basic information concerning iodine intake and iodine nutrition in China.

| Province       | Water iodine (μg/L) | Salt         |            |        | CRIS (%) | CRQIS (%) | Iodine supplement in pregnant women (%) | MUIC (μg/L) |                |                     | Children Goiter rate (%) |
|----------------|---------------------|--------------|------------|--------|----------|-----------|-----------------------------------------|-------------|----------------|---------------------|--------------------------|
|                |                     | Salt iodine  |            |        |          |           |                                         | children    | Pregnant women | Adults <sup>a</sup> |                          |
|                |                     | Mean (mg/kg) | SD (mg/kg) | CV (%) |          |           |                                         |             |                |                     |                          |
| Beijing        | 3.4                 | 24.4         | 4.95       | 20.3   | 92.4     | 86.5      | 75.5                                    | 194.2       | 149.2          | 147.2               | 3.0                      |
| Tianjin        | 5.1                 | 24.8         | 5.38       | 21.7   | 67.0     | 55.7      | 1.4                                     | 187.6       | 164.9          | 171.4               | 2.5                      |
| Hebei          | 4.7                 | 23.3         | 3.77       | 16.2   | 96.0     | 91.1      | 1.5                                     | 208.0       | 174.6          | 201.1               | 1.6                      |
| Shanxi         | 5.0                 | 23.8         | 3.90       | 16.4   | 98.7     | 95.0      | 0.3                                     | 237.2       | 190.5          | 212.4               | 2.1                      |
| Inner Mongolia | 6.7                 | 23.3         | 4.54       | 19.5   | 98.8     | 94.2      | 0.7                                     | 220.0       | 176.3          | 207.0               | 1.3                      |
| Liaoning       | 3.7                 | 24.3         | 3.23       | 13.3   | 98.9     | 97.2      | 6.9                                     | 180.4       | 151.6          | 148.6               | 1.8                      |
| Jilin          | 4.6                 | 24.1         | 3.90       | 16.2   | 99.8     | 97.3      | 1.5                                     | 181.9       | 168.1          | 179.9               | 0.5                      |
| Heilongjiang   | 5.0                 | 25.0         | 4.30       | 17.2   | 99.5     | 97.9      | 0.1                                     | 176.3       | 188.7          | 155.8               | 0.5                      |
| Shanghai       | 2.7                 | 24.1         | 5.21       | 21.6   | 65.4     | 53.6      | 4.7                                     | 243.6       | 142.9          | 163.5               | 2.0                      |
| Jiangsu        | 7.3                 | 23.8         | 3.67       | 15.4   | 98.1     | 95.1      | 2.3                                     | 232.0       | 163.8          | 307.0               | 1.9                      |
| Zhejiang       | 2.1                 | 23.6         | 3.82       | 16.2   | 81.1     | 76.3      | 12.2                                    | 199.9       | 137.6          | 154.9               | 2.2                      |
| Anhui          | 4.3                 | 24.0         | 3.17       | 13.2   | 96.3     | 94.0      | 0.7                                     | 277.9       | 195.4          | 208.7               | 1.3                      |
| Fujian         | 2.2                 | 24.4         | 2.88       | 11.8   | 94.5     | 92.3      | 4.8                                     | 202.9       | 143.6          | 135.4               | 1.8                      |
| Jiangxi        | 2.5                 | 24.6         | 3.79       | 15.4   | 99.7     | 96.7      | 1.3                                     | 205.3       | 189.7          | 176.7               | 0.3                      |
| Shandong       | 9.2                 | 23.5         | 4.75       | 20.2   | 85.4     | 77.7      | 1.1                                     | 197.9       | 160.8          | 127.9               | 2.7                      |
| Henan          | 9.6                 | 26.2         | 4.27       | 16.3   | 98.0     | 92.6      | 0.3                                     | 250.1       | 205.1          | 225.5               | 1.2                      |
| Hubei          | 3.7                 | 25.2         | 3.91       | 15.5   | 99.5     | 96.0      | 1.3                                     | 225.9       | 175.9          | 192.2               | 1.3                      |
| Hunan          | 2.5                 | 26.8         | 4.13       | 15.4   | 99.6     | 95.8      | 0.6                                     | 261.1       | 199.3          | 173.8               | 0.8                      |
| Guangdong      | 5.1                 | 24.9         | 3.31       | 13.3   | 98.2     | 97.0      | 0.8                                     | 221.3       | 171.9          | 127.0               | 0.8                      |
| Guangxi        | 3.3                 | 24.6         | 3.74       | 15.2   | 98.9     | 95.9      | 0.2                                     | 194.9       | 180.6          | 153.6               | 0.5                      |
| Hainan         | 6.0                 | 24.0         | 3.31       | 13.8   | 98.2     | 95.4      | 0.1                                     | 194.5       | 131.1          | 152.2               | 0.1                      |
| Chongqing      | 1.5                 | 26.1         | 4.20       | 16.1   | 99.3     | 94.6      | 0.6                                     | 237.2       | 179.6          | 193.5               | 2.1                      |
| Sichuan        | 2.1                 | 27.2         | 4.05       | 14.9   | 99.2     | 95.5      | 1.9                                     | 210.5       | 179.3          | 170.9               | 1.7                      |
| Guizhou        | 1.8                 | 26.6         | 3.83       | 14.4   | 99.9     | 96.6      | 0.4                                     | 220.5       | 174.0          | 200.2               | 1.3                      |
| Yunnan         | 1.3                 | 24.3         | 3.94       | 16.2   | 99.5     | 95.9      | 0.6                                     | 233.8       | 172.5          | 177.0               | 1.3                      |
| Tibet          | 2.2                 | 28.2         | 6.77       | 24.0   | 99.7     | 95.2      | 19.2                                    | 232.7       | 131.5          | 148.3               | 0.1                      |
| Shannxi        | 4.6                 | 24.6         | 3.67       | 14.9   | 99.9     | 97.1      | 1.8                                     | 240.1       | 184.7          | 220.9               | 1.6                      |

|          |     |      |      |      |      |      |      |       |       |       |     |
|----------|-----|------|------|------|------|------|------|-------|-------|-------|-----|
| Gansu    | 2.2 | 25.9 | 3.76 | 14.5 | 99.5 | 95.2 | 0.5  | 208.2 | 178.7 | 227.9 | 1.1 |
| Qinghai  | 1.7 | 26.6 | 4.34 | 16.3 | 98.8 | 93.5 | 5.8  | 213.1 | 184.8 | 218.3 | 0.7 |
| Ningxia  | 6.4 | 25.9 | 4.53 | 17.5 | 99.1 | 94.1 | 1.0  | 215.6 | 177.3 | 261.0 | 0.6 |
| Xinjiang | 3.8 | 27.5 | 4.43 | 16.1 | 99.9 | 96.5 | 25.4 | 243.8 | 207.4 | 152.9 | 0.5 |
| Total    | 3.4 | 25.0 | 4.30 | 17.2 | 95.9 | 92.0 | 3.3  | 221.0 | 175.5 | 180.4 | 1.5 |

Note: <sup>a</sup> Data from TIDE project; SD, The standard deviation; CRIS, coverage rate of iodized salt; CRQIS, consumption rate of qualified iodized salt; MUIC, median urine iodine concentration; TD, thyroid disease.

Table S2. Estimated iodine intake and urine iodine levels after changes in salt iodine content in 31 provinces of China (children).

| Province       | M-TII<br>(µg/d) | M-SII<br>(µg/d) | Iodine content 15 mg/kg |                 |                  | Iodine content 20 mg/kg |                 |                  | Iodine content 25 mg/kg |                 |                  | Iodine content 30 mg/kg |                 |                  | Iodine content 35 mg/kg |                 |                  |
|----------------|-----------------|-----------------|-------------------------|-----------------|------------------|-------------------------|-----------------|------------------|-------------------------|-----------------|------------------|-------------------------|-----------------|------------------|-------------------------|-----------------|------------------|
|                |                 |                 | P-SII<br>(µg/d)         | P-TII<br>(µg/d) | E-MUIC<br>(µg/L) |
| Beijing        | 187.6           | 97.6            | 60.0                    | 150.0           | 155.3            | 80.0                    | 170.0           | 176.0            | 100.0                   | 190.0           | 196.7            | 120.0                   | 210.0           | 217.4            | 140.0                   | 230.0           | 238.1            |
| Tianjin        | 181.3           | 99.2            | 60.0                    | 142.1           | 147.0            | 80.0                    | 162.1           | 167.7            | 100.0                   | 182.1           | 188.4            | 120.0                   | 202.1           | 209.1            | 140.0                   | 222.1           | 229.8            |
| Hebei          | 201.0           | 93.2            | 60.0                    | 167.8           | 173.6            | 80.0                    | 187.8           | 194.3            | 100.0                   | 207.8           | 215.0            | 120.0                   | 227.8           | 235.7            | 140.0                   | 247.8           | 256.4            |
| Shanxi         | 229.2           | 95.2            | 60.0                    | 194.0           | 200.8            | 80.0                    | 214.0           | 221.5            | 100.0                   | 234.0           | 242.2            | 120.0                   | 254.0           | 262.9            | 140.0                   | 274.0           | 283.6            |
| Inner Mongolia | 212.6           | 93.2            | 60.0                    | 179.4           | 185.6            | 80.0                    | 199.4           | 206.3            | 100.0                   | 219.4           | 227.0            | 120.0                   | 239.4           | 247.7            | 140.0                   | 259.4           | 268.4            |
| Liaoning       | 174.3           | 97.2            | 60.0                    | 137.1           | 141.9            | 80.0                    | 157.1           | 162.6            | 100.0                   | 177.1           | 183.3            | 120.0                   | 197.1           | 204.0            | 140.0                   | 217.1           | 224.7            |
| Jilin          | 175.7           | 96.4            | 60.0                    | 139.3           | 144.2            | 80.0                    | 159.3           | 164.9            | 100.0                   | 179.3           | 185.6            | 120.0                   | 199.3           | 206.3            | 140.0                   | 219.3           | 227.0            |
| Heilongjiang   | 170.3           | 100.0           | 60.0                    | 130.3           | 134.9            | 80.0                    | 150.3           | 155.6            | 100.0                   | 170.3           | 176.3            | 120.0                   | 190.3           | 197.0            | 140.0                   | 210.3           | 217.7            |
| Shanghai       | 235.4           | 96.4            | 60.0                    | 199.0           | 205.9            | 80.0                    | 219.0           | 226.6            | 100.0                   | 239.0           | 247.3            | 120.0                   | 259.0           | 268.0            | 140.0                   | 279.0           | 288.7            |
| Jiangsu        | 224.2           | 95.2            | 60.0                    | 189.0           | 195.6            | 80.0                    | 209.0           | 216.3            | 100.0                   | 229.0           | 237.0            | 120.0                   | 249.0           | 257.7            | 140.0                   | 269.0           | 278.4            |
| Zhejiang       | 193.1           | 94.4            | 60.0                    | 158.7           | 164.3            | 80.0                    | 178.7           | 185.0            | 100.0                   | 198.7           | 205.7            | 120.0                   | 218.7           | 226.4            | 140.0                   | 238.7           | 247.1            |
| Anhui          | 268.5           | 96.0            | 60.0                    | 232.5           | 240.6            | 80.0                    | 252.5           | 261.3            | 100.0                   | 272.5           | 282.0            | 120.0                   | 292.5           | 302.7            | 140.0                   | 312.5           | 323.4            |
| Fujian         | 196.0           | 97.6            | 60.0                    | 158.4           | 164.0            | 80.0                    | 178.4           | 184.7            | 100.0                   | 198.4           | 205.4            | 120.0                   | 218.4           | 226.1            | 140.0                   | 238.4           | 246.8            |
| Jiangxi        | 198.4           | 98.4            | 60.0                    | 160.0           | 165.6            | 80.0                    | 180.0           | 186.3            | 100.0                   | 200.0           | 207.0            | 120.0                   | 220.0           | 227.7            | 140.0                   | 240.0           | 248.4            |
| Shandong       | 191.2           | 94.0            | 60.0                    | 157.2           | 162.7            | 80.0                    | 177.2           | 183.4            | 100.0                   | 197.2           | 204.1            | 120.0                   | 217.2           | 224.8            | 140.0                   | 237.2           | 245.5            |
| Henan          | 241.6           | 104.8           | 60.0                    | 196.8           | 203.7            | 80.0                    | 216.8           | 224.4            | 100.0                   | 236.8           | 245.1            | 120.0                   | 256.8           | 265.8            | 140.0                   | 276.8           | 286.5            |
| Hubei          | 218.3           | 100.8           | 60.0                    | 177.5           | 183.7            | 80.0                    | 197.5           | 204.4            | 100.0                   | 217.5           | 225.1            | 120.0                   | 237.5           | 245.8            | 140.0                   | 257.5           | 266.5            |
| Hunan          | 252.3           | 107.2           | 60.0                    | 205.1           | 212.2            | 80.0                    | 225.1           | 232.9            | 100.0                   | 245.1           | 253.6            | 120.0                   | 265.1           | 274.3            | 140.0                   | 285.1           | 295.0            |
| Guangdong      | 213.8           | 99.6            | 60.0                    | 174.2           | 180.3            | 80.0                    | 194.2           | 201.0            | 100.0                   | 214.2           | 221.7            | 120.0                   | 234.2           | 242.4            | 140.0                   | 254.2           | 263.1            |
| Guangxi        | 188.3           | 98.4            | 60.0                    | 149.9           | 155.2            | 80.0                    | 169.9           | 175.9            | 100.0                   | 189.9           | 196.6            | 120.0                   | 209.9           | 217.3            | 140.0                   | 229.9           | 238.0            |
| Hainan         | 187.9           | 96.0            | 60.0                    | 151.9           | 157.2            | 80.0                    | 171.9           | 177.9            | 100.0                   | 191.9           | 198.6            | 120.0                   | 211.9           | 219.3            | 140.0                   | 231.9           | 240.0            |
| Chongqing      | 229.2           | 104.4           | 60.0                    | 184.8           | 191.2            | 80.0                    | 204.8           | 211.9            | 100.0                   | 224.8           | 232.6            | 120.0                   | 244.8           | 253.3            | 140.0                   | 264.8           | 274.0            |

| Province | M-TII<br>(μg/d) | M-SII<br>(μg/d) | Iodine content 15 mg/kg |                 |                  | Iodine content 20 mg/kg |                 |                  | Iodine content 25 mg/kg |                 |                  | Iodine content 30 mg/kg |                 |                  | Iodine content 35 mg/kg |                 |                  |
|----------|-----------------|-----------------|-------------------------|-----------------|------------------|-------------------------|-----------------|------------------|-------------------------|-----------------|------------------|-------------------------|-----------------|------------------|-------------------------|-----------------|------------------|
|          |                 |                 | P-SII<br>(μg/d)         | P-TII<br>(μg/d) | E-MUIC<br>(μg/L) |
| Sichuan  | 203.4           | 108.8           | 60.0                    | 154.6           | 160.0            | 80.0                    | 174.6           | 180.7            | 100.0                   | 194.6           | 201.4            | 120.0                   | 214.6           | 222.1            | 140.0                   | 234.6           | 242.8            |
| Guizhou  | 213.0           | 106.4           | 60.0                    | 166.6           | 172.5            | 80.0                    | 186.6           | 193.2            | 100.0                   | 206.6           | 213.9            | 120.0                   | 226.6           | 234.6            | 140.0                   | 246.6           | 255.3            |
| Yunnan   | 225.9           | 97.2            | 60.0                    | 188.7           | 195.3            | 80.0                    | 208.7           | 216.0            | 100.0                   | 228.7           | 236.7            | 120.0                   | 248.7           | 257.4            | 140.0                   | 268.7           | 278.1            |
| Tibet    | 224.8           | 112.8           | 60.0                    | 172.0           | 178.1            | 80.0                    | 192.0           | 198.8            | 100.0                   | 212.0           | 219.5            | 120.0                   | 232.0           | 240.2            | 140.0                   | 252.0           | 260.9            |
| Shaanxi  | 232.0           | 98.4            | 60.0                    | 193.6           | 200.4            | 80.0                    | 213.6           | 221.1            | 100.0                   | 233.6           | 241.8            | 120.0                   | 253.6           | 262.5            | 140.0                   | 273.6           | 283.2            |
| Gansu    | 201.2           | 103.6           | 60.0                    | 157.6           | 163.1            | 80.0                    | 177.6           | 183.8            | 100.0                   | 197.6           | 204.5            | 120.0                   | 217.6           | 225.2            | 140.0                   | 237.6           | 245.9            |
| Qinghai  | 205.9           | 106.4           | 60.0                    | 159.5           | 165.1            | 80.0                    | 179.5           | 185.8            | 100.0                   | 199.5           | 206.5            | 120.0                   | 219.5           | 227.2            | 140.0                   | 239.5           | 247.9            |
| Ningxia  | 208.3           | 103.6           | 60.0                    | 164.7           | 170.5            | 80.0                    | 184.7           | 191.2            | 100.0                   | 204.7           | 211.9            | 120.0                   | 224.7           | 232.6            | 140.0                   | 244.7           | 253.3            |
| Xinjiang | 235.6           | 110.0           | 60.0                    | 185.6           | 192.1            | 80.0                    | 205.6           | 212.8            | 100.0                   | 225.6           | 233.5            | 120.0                   | 245.6           | 254.2            | 140.0                   | 265.6           | 274.9            |
| Total    | 213.5           | 100.0           | 60.0                    | 173.5           | 179.6            | 80.0                    | 193.5           | 200.3            | 100.0                   | 213.5           | 221.0            | 120.0                   | 233.5           | 241.7            | 140.0                   | 253.5           | 262.4            |

Note: M-TII represents the estimated total daily iodine intake from diet, drinking water and salt according to the latest MUIC;

M-SII represents the estimated daily salt iodine intake according to the recommended salt consumption by Chinese Dietary Guidelines and the actual iodine content;

P-SII represents the estimated daily salt iodine intake of each province according to the recommended salt consumption by Chinese Dietary Guidelines and the preset salt iodine content;

P-TII represents the estimated total daily iodine intake from diet, drinking water and salt according to the preset salt iodine content;

E-MUIC represents the estimated median of urinary iodine after the adjustment of salt iodine content.

Table S3. Estimated iodine intake and urine iodine levels after changes in salt iodine content in 31 provinces of China (adults).

| Province          | M-TII<br>(µg/d) | M-SII<br>(µg/d) | Iodine content 15 mg/kg |        |        | Iodine content 20 mg/kg |        |        | Iodine content 25 mg/kg |        |        | Iodine content 30 mg/kg |        |        | Iodine content 35 mg/kg |        |        |
|-------------------|-----------------|-----------------|-------------------------|--------|--------|-------------------------|--------|--------|-------------------------|--------|--------|-------------------------|--------|--------|-------------------------|--------|--------|
|                   |                 |                 | P-SII                   | P-TII  | E-MUIC |
|                   |                 |                 | (µg/d)                  | (µg/d) | (µg/L) |
| Beijing           | 248.9           | 203.8           | 125.3                   | 170.4  | 100.8  | 167.1                   | 212.1  | 125.5  | 208.8                   | 253.9  | 150.2  | 250.6                   | 295.7  | 174.9  | 292.4                   | 337.4  | 199.6  |
| Tianjin           | 289.8           | 177.1           | 107.1                   | 219.8  | 130.0  | 142.8                   | 255.5  | 151.1  | 178.5                   | 291.2  | 172.2  | 214.2                   | 326.9  | 193.4  | 249.9                   | 362.6  | 214.5  |
| Hebei             | 340.0           | 177.0           | 114.0                   | 277.0  | 163.8  | 152.0                   | 314.9  | 186.3  | 190.0                   | 352.9  | 208.7  | 227.9                   | 390.9  | 231.2  | 265.9                   | 428.9  | 253.7  |
| Shanxi            | 359.1           | 182.5           | 115.0                   | 291.7  | 172.5  | 153.4                   | 330.0  | 195.2  | 191.7                   | 368.3  | 217.8  | 230.0                   | 406.7  | 240.5  | 268.4                   | 445.0  | 263.2  |
| Inner<br>Mongolia | 350.0           | 171.5           | 110.4                   | 288.9  | 170.9  | 147.2                   | 325.7  | 192.6  | 184.1                   | 362.5  | 214.4  | 220.9                   | 399.3  | 236.2  | 257.7                   | 436.1  | 257.9  |
| Liaoning          | 251.3           | 147.6           | 91.1                    | 194.8  | 115.2  | 121.5                   | 225.1  | 133.2  | 151.8                   | 255.5  | 151.1  | 182.2                   | 285.9  | 169.1  | 212.6                   | 316.2  | 187.0  |
| Jilin             | 304.2           | 151.1           | 94.1                    | 247.1  | 146.2  | 125.4                   | 278.5  | 164.7  | 156.8                   | 309.8  | 183.2  | 188.1                   | 341.2  | 201.8  | 219.5                   | 372.5  | 220.3  |
| Heilongjiang      | 263.4           | 155.9           | 93.6                    | 201.1  | 118.9  | 124.7                   | 232.2  | 137.4  | 155.9                   | 263.4  | 155.8  | 187.1                   | 294.6  | 174.2  | 218.3                   | 325.8  | 192.7  |
| Shanghai          | 276.4           | 152.4           | 94.8                    | 218.9  | 129.5  | 126.4                   | 250.5  | 148.2  | 158.0                   | 282.1  | 166.9  | 189.7                   | 313.7  | 185.6  | 221.3                   | 345.4  | 204.3  |
| Jiangsu           | 519.1           | 170.4           | 107.4                   | 456.1  | 269.7  | 143.2                   | 491.9  | 290.9  | 178.9                   | 527.7  | 312.1  | 214.7                   | 563.5  | 333.2  | 250.5                   | 599.2  | 354.4  |
| Zhejiang          | 261.9           | 163.2           | 103.7                   | 202.4  | 119.7  | 138.3                   | 237.0  | 140.2  | 172.9                   | 271.6  | 160.6  | 207.4                   | 306.2  | 181.1  | 242.0                   | 340.7  | 201.5  |
| Anhui             | 352.9           | 187.0           | 116.9                   | 282.7  | 167.2  | 155.8                   | 321.7  | 190.3  | 194.8                   | 360.7  | 213.3  | 233.8                   | 399.6  | 236.4  | 272.7                   | 438.6  | 259.4  |
| Fujian            | 228.9           | 157.2           | 96.7                    | 168.4  | 99.6   | 128.9                   | 200.6  | 118.6  | 161.1                   | 232.8  | 137.7  | 193.3                   | 265.0  | 156.7  | 225.5                   | 297.2  | 175.8  |
| Jiangxi           | 298.8           | 178.7           | 109.0                   | 229.0  | 135.5  | 145.3                   | 265.4  | 156.9  | 181.6                   | 301.7  | 178.4  | 217.9                   | 338.0  | 199.9  | 254.3                   | 374.3  | 221.4  |
| Shandong          | 216.3           | 159.7           | 101.9                   | 158.5  | 93.7   | 135.9                   | 192.5  | 113.8  | 169.9                   | 226.4  | 133.9  | 203.8                   | 260.4  | 154.0  | 237.8                   | 294.4  | 174.1  |
| Henan             | 381.3           | 231.4           | 132.5                   | 282.4  | 167.0  | 176.6                   | 326.5  | 193.1  | 220.8                   | 370.7  | 219.2  | 264.9                   | 414.8  | 245.3  | 309.1                   | 459.0  | 271.5  |
| Hubei             | 325.0           | 225.7           | 134.4                   | 233.6  | 138.2  | 179.2                   | 278.4  | 164.7  | 223.9                   | 323.2  | 191.1  | 268.7                   | 368.0  | 217.6  | 313.5                   | 412.8  | 244.1  |
| Hunan             | 293.9           | 222.7           | 124.6                   | 195.8  | 115.8  | 166.2                   | 237.4  | 140.4  | 207.7                   | 278.9  | 165.0  | 249.3                   | 320.5  | 189.5  | 290.8                   | 362.0  | 214.1  |
| Guangdong         | 214.7           | 183.4           | 110.5                   | 141.8  | 83.9   | 147.3                   | 178.6  | 105.7  | 184.1                   | 215.5  | 127.4  | 221.0                   | 252.3  | 149.2  | 257.8                   | 289.1  | 171.0  |
| Guangxi           | 259.7           | 154.9           | 94.5                    | 199.3  | 117.8  | 125.9                   | 230.7  | 136.5  | 157.4                   | 262.2  | 155.1  | 188.9                   | 293.7  | 173.7  | 220.4                   | 325.2  | 192.3  |
| Hainan            | 257.3           | 179.7           | 112.3                   | 189.9  | 112.3  | 149.8                   | 227.4  | 134.5  | 187.2                   | 264.8  | 156.6  | 224.7                   | 302.3  | 178.8  | 262.1                   | 339.7  | 200.9  |

| Province  | M-TII<br>(μg/d) | M-SII<br>(μg/d) | Iodine content 15 mg/kg |        |        | Iodine content 20 mg/kg |        |        | Iodine content 25 mg/kg |        |        | Iodine content 30 mg/kg |        |        | Iodine content 35 mg/kg |        |        |
|-----------|-----------------|-----------------|-------------------------|--------|--------|-------------------------|--------|--------|-------------------------|--------|--------|-------------------------|--------|--------|-------------------------|--------|--------|
|           |                 |                 | P-SII                   | P-TII  | E-MUIC |
|           |                 |                 | (μg/d)                  | (μg/d) | (μg/L) |
| Chongqing | 327.2           | 187.0           | 107.4                   | 247.7  | 146.5  | 143.3                   | 283.5  | 167.7  | 179.1                   | 319.3  | 188.8  | 214.9                   | 355.1  | 210.0  | 250.7                   | 390.9  | 231.2  |
| Sichuan   | 289.0           | 198.1           | 109.2                   | 200.1  | 118.4  | 145.7                   | 236.5  | 139.9  | 182.1                   | 272.9  | 161.4  | 218.5                   | 309.4  | 183.0  | 254.9                   | 345.8  | 204.5  |
| Guizhou   | 338.5           | 207.3           | 116.9                   | 248.1  | 146.7  | 155.9                   | 287.1  | 169.8  | 194.9                   | 326.0  | 192.8  | 233.8                   | 365.0  | 215.9  | 272.8                   | 404.0  | 238.9  |
| Yunnan    | 299.3           | 187.4           | 115.6                   | 227.6  | 134.6  | 154.2                   | 266.1  | 157.4  | 192.7                   | 304.7  | 180.2  | 231.3                   | 343.2  | 203.0  | 269.8                   | 381.8  | 225.8  |
| Tibet     | 250.7           | 250.7           | 141.7                   | 141.7  | 83.8   | 188.9                   | 188.9  | 111.7  | 236.1                   | 236.1  | 139.6  | 283.3                   | 283.3  | 167.6  | 330.6                   | 330.6  | 195.5  |
| Shaanxi   | 373.5           | 197.4           | 120.4                   | 296.5  | 175.3  | 160.5                   | 336.6  | 199.1  | 200.6                   | 376.7  | 222.8  | 240.7                   | 416.8  | 246.5  | 280.8                   | 456.9  | 270.3  |
| Gansu     | 385.3           | 197.3           | 114.3                   | 302.3  | 178.8  | 152.4                   | 340.4  | 201.3  | 190.5                   | 378.5  | 223.8  | 228.6                   | 416.6  | 246.4  | 266.7                   | 454.7  | 268.9  |
| Qinghai   | 369.1           | 241.2           | 136.0                   | 263.9  | 156.1  | 181.3                   | 309.3  | 182.9  | 226.7                   | 354.6  | 209.7  | 272.0                   | 399.9  | 236.5  | 317.3                   | 445.3  | 263.3  |
| Ningxia   | 441.3           | 193.3           | 111.9                   | 360.0  | 212.9  | 149.2                   | 397.3  | 235.0  | 186.5                   | 434.6  | 257.0  | 223.8                   | 471.9  | 279.1  | 261.2                   | 509.2  | 301.2  |
| Xinjiang  | 258.5           | 249.4           | 136.0                   | 145.2  | 85.9   | 181.4                   | 190.5  | 112.7  | 226.7                   | 235.9  | 139.5  | 272.1                   | 281.2  | 166.3  | 317.4                   | 326.5  | 193.1  |
| Total     | 305.0           | 186.9           | 112.1                   | 230.3  | 136.2  | 149.5                   | 267.7  | 158.3  | 186.9                   | 305.0  | 180.4  | 224.2                   | 342.4  | 202.5  | 261.6                   | 379.8  | 224.6  |

Note: M-TII represents the estimated total daily iodine intake from diet, drinking water and salt according to the latest MUIC;

M-SII represents the estimated daily salt iodine intake according to the latest salt consumption and the actual iodine content;

P-SII represents the estimated daily salt iodine intake of each province according to the latest salt consumption and the preset salt iodine content;

P-TII represents the estimated total daily iodine intake from diet, drinking water and salt according to the preset salt iodine content;

E-MUIC represents the estimated median of urinary iodine after the adjustment of salt iodine content.

Table S4. Estimated iodine intake and urine iodine levels after changes in salt iodine content in 31 provinces of China (pregnant women).

| Province          | M-TII<br>(µg/d) | M-SII<br>(µg/d) | Iodine content 25 mg/kg |        |        | Iodine content 30 mg/kg |        |        | Iodine content 35 mg/kg |        |        | Iodine content 40 mg/kg |        |        |
|-------------------|-----------------|-----------------|-------------------------|--------|--------|-------------------------|--------|--------|-------------------------|--------|--------|-------------------------|--------|--------|
|                   |                 |                 | P-SII                   | P-TII  | E-MUIC |
|                   |                 |                 | (µg/d)                  | (µg/d) | (µg/L) |
| Beijing           | 252.3           | 203.8           | 208.8                   | 257.2  | 152.1  | 250.6                   | 299.1  | 176.9  | 292.4                   | 340.8  | 201.6  | 334.1                   | 382.6  | 226.3  |
| Tianjin           | 278.8           | 177.1           | 178.5                   | 280.2  | 165.7  | 214.2                   | 315.9  | 186.9  | 249.9                   | 351.6  | 208.0  | 285.6                   | 387.4  | 229.1  |
| Hebei             | 295.2           | 177.0           | 190.0                   | 308.2  | 182.3  | 227.9                   | 346.1  | 204.7  | 265.9                   | 384.1  | 227.2  | 303.9                   | 422.1  | 249.6  |
| Shanxi            | 322.1           | 182.5           | 191.7                   | 331.3  | 195.9  | 230.0                   | 369.6  | 218.6  | 268.4                   | 408.0  | 241.3  | 306.7                   | 446.3  | 264.0  |
| Inner<br>Mongolia | 298.1           | 171.5           | 184.1                   | 310.7  | 183.7  | 220.9                   | 347.4  | 205.5  | 257.7                   | 384.2  | 227.2  | 294.5                   | 421.0  | 249.0  |
| Liaoning          | 256.3           | 147.6           | 151.8                   | 260.6  | 154.1  | 182.2                   | 290.9  | 172.1  | 212.6                   | 321.3  | 190.0  | 242.9                   | 351.7  | 208.0  |
| Jilin             | 284.2           | 151.1           | 156.8                   | 289.9  | 171.4  | 188.1                   | 321.2  | 190.0  | 219.5                   | 352.6  | 208.5  | 250.8                   | 383.9  | 227.1  |
| Heilongjiang      | 319.1           | 155.9           | 155.9                   | 319.0  | 188.7  | 187.1                   | 350.2  | 207.1  | 218.3                   | 381.4  | 225.6  | 249.5                   | 412.6  | 244.0  |
| Shanghai          | 241.6           | 152.4           | 158.0                   | 247.3  | 146.3  | 189.7                   | 278.9  | 165.0  | 221.3                   | 310.5  | 183.7  | 252.9                   | 342.1  | 202.3  |
| Jiangsu           | 277.0           | 170.4           | 178.9                   | 285.5  | 168.9  | 214.7                   | 321.3  | 190.0  | 250.5                   | 357.1  | 211.2  | 286.3                   | 392.9  | 232.4  |
| Zhejiang          | 232.7           | 163.2           | 172.9                   | 242.4  | 143.3  | 207.4                   | 276.9  | 163.8  | 242.0                   | 311.5  | 184.2  | 276.6                   | 346.0  | 204.7  |
| Anhui             | 330.4           | 187.0           | 194.8                   | 338.2  | 200.0  | 233.8                   | 377.1  | 223.1  | 272.7                   | 416.1  | 246.1  | 311.7                   | 455.1  | 269.1  |
| Fujian            | 242.8           | 157.2           | 161.1                   | 246.7  | 145.9  | 193.3                   | 278.9  | 164.9  | 225.5                   | 311.1  | 184.0  | 257.8                   | 343.3  | 203.1  |
| Jiangxi           | 320.7           | 178.7           | 181.6                   | 323.6  | 191.4  | 217.9                   | 360.0  | 212.9  | 254.3                   | 396.3  | 234.4  | 290.6                   | 432.6  | 255.9  |
| Shandong          | 271.9           | 159.7           | 169.9                   | 282.1  | 166.8  | 203.8                   | 316.1  | 186.9  | 237.8                   | 350.0  | 207.0  | 271.8                   | 384.0  | 227.1  |
| Henan             | 346.8           | 231.4           | 220.8                   | 336.2  | 198.8  | 264.9                   | 380.3  | 224.9  | 309.1                   | 424.5  | 251.1  | 353.2                   | 468.7  | 277.2  |
| Hubei             | 297.4           | 225.7           | 223.9                   | 295.6  | 174.9  | 268.7                   | 340.4  | 201.3  | 313.5                   | 385.2  | 227.8  | 358.3                   | 430.0  | 254.3  |
| Hunan             | 337.0           | 222.7           | 207.7                   | 322.0  | 190.5  | 249.3                   | 363.6  | 215.0  | 290.8                   | 405.1  | 239.6  | 332.4                   | 446.7  | 264.2  |
| Guangdong         | 290.7           | 183.4           | 184.1                   | 291.3  | 172.3  | 221.0                   | 328.2  | 194.1  | 257.8                   | 365.0  | 215.9  | 294.6                   | 401.9  | 237.7  |
| Guangxi           | 305.4           | 154.9           | 157.4                   | 307.9  | 182.1  | 188.9                   | 339.4  | 200.7  | 220.4                   | 370.9  | 219.3  | 251.9                   | 402.3  | 238.0  |

| Province  | M-TII<br>(μg/d) | M-SII<br>(μg/d) | Iodine content 25 mg/kg |        |        | Iodine content 30 mg/kg |        |        | Iodine content 35 mg/kg |        |        | Iodine content 40 mg/kg |        |        |
|-----------|-----------------|-----------------|-------------------------|--------|--------|-------------------------|--------|--------|-------------------------|--------|--------|-------------------------|--------|--------|
|           |                 |                 | P-SII                   | P-TII  | E-MUIC |
|           |                 |                 | (μg/d)                  | (μg/d) | (μg/L) |
| Hainan    | 221.7           | 179.7           | 187.2                   | 229.1  | 135.5  | 224.7                   | 266.6  | 157.7  | 262.1                   | 304.0  | 179.8  | 299.6                   | 341.5  | 202.0  |
| Chongqing | 303.7           | 187.0           | 179.1                   | 295.8  | 174.9  | 214.9                   | 331.6  | 196.1  | 250.7                   | 367.4  | 217.3  | 286.5                   | 403.2  | 238.5  |
| Sichuan   | 303.2           | 198.1           | 182.1                   | 287.2  | 169.8  | 218.5                   | 323.6  | 191.4  | 254.9                   | 360.0  | 212.9  | 291.3                   | 396.4  | 234.4  |
| Guizhou   | 294.2           | 207.3           | 194.9                   | 281.8  | 166.6  | 233.8                   | 320.7  | 189.7  | 272.8                   | 359.7  | 212.7  | 311.8                   | 398.6  | 235.8  |
| Yunnan    | 291.7           | 187.4           | 192.7                   | 297.0  | 175.7  | 231.3                   | 335.6  | 198.5  | 269.8                   | 374.2  | 221.3  | 308.4                   | 412.7  | 244.1  |
| Tibet     | 266.3           | 266.3           | 236.1                   | 236.1  | 139.6  | 283.3                   | 283.3  | 167.6  | 330.6                   | 330.6  | 195.5  | 377.8                   | 377.8  | 223.4  |
| Shannxi   | 312.3           | 197.4           | 200.6                   | 315.5  | 186.6  | 240.7                   | 355.6  | 210.3  | 280.8                   | 395.7  | 234.1  | 320.9                   | 435.9  | 257.8  |
| Gansu     | 302.1           | 197.3           | 190.5                   | 295.3  | 174.6  | 228.6                   | 333.4  | 197.2  | 266.7                   | 371.5  | 219.7  | 304.8                   | 409.6  | 242.2  |
| Qinghai   | 312.5           | 241.2           | 226.7                   | 298.0  | 176.2  | 272.0                   | 343.3  | 203.0  | 317.3                   | 388.6  | 229.8  | 362.7                   | 434.0  | 256.7  |
| Ningxia   | 299.8           | 193.3           | 186.5                   | 293.0  | 173.3  | 223.8                   | 330.4  | 195.4  | 261.2                   | 367.7  | 217.5  | 298.5                   | 405.0  | 239.5  |
| Xinjiang  | 350.7           | 249.4           | 226.7                   | 328.0  | 194.0  | 272.1                   | 373.3  | 220.8  | 317.4                   | 418.7  | 247.6  | 362.7                   | 464.0  | 274.4  |
| Total     | 296.7           | 186.9           | 186.9                   | 296.8  | 175.5  | 224.2                   | 334.1  | 197.6  | 261.6                   | 371.5  | 219.7  | 299.0                   | 408.9  | 241.8  |

Note: M-TII represents the estimated total daily iodine intake from diet, drinking water and salt according to the latest MUIC;

M-SII represents the estimated daily salt iodine intake according to the latest salt consumption and the actual iodine content;

P-SII represents the estimated daily salt iodine intake of each province according to the latest salt consumption and the actual iodine content;

P-TII represents the estimated total daily iodine intake from diet, drinking water and salt according to the preset salt iodine content;

E-MUIC represents the estimated median of urinary iodine after the adjustment of salt iodine content.
